# Supplementary material for: Layer-by-layer preparation of 3D covalent organic framework/silica composites for chromatographic separation of position isomers
Source: Royal Society of Chemistry journal article supplement (doi:10.1039/c8cc06621c), 2018-01-01
Supplement: c8cc06621c1.pdf [file c8cc06621c1.pdf]

**Layer-by-layer preparation of 3D covalent organic framework/  
silica composites for chromatographic separation of position  
isomers**

Hai-Long Qian<sup>a,b,c</sup>, Cheng Yang<sup>a,b,c</sup> and Xiu-Ping Yan<sup>a,b,c,\*</sup>

*<sup>a</sup> State Key Laboratory of Food Science and Technology, Jiangnan University, Wuxi  
214122, China*

*<sup>b</sup> International Joint Laboratory on Food Safety, Jiangnan University, Wuxi 214122,  
China*

*<sup>c</sup> Institute of Analytical Food Safety, School of Food Science and Technology,  
Jiangnan University, Wuxi 214122, China*

## Experimental Section

**Reagents.** All chemicals and reagents used were at least of analytical grade. Tetra(4-anilyl)methane (TAM) was obtained from Bide Pharmatech Ltd. (Shanghai, China). Terephthalaldehyde (TPDA), dioxane, mesitylene and all the analytes used in the HPLC experiment were purchased from Aladdin Chemistry Co. Ltd. (Shanghai, China). 5  $\mu\text{m}$  Aminosilica ( $\text{SiO}_2\text{-NH}_2$ ) and 5  $\mu\text{m}$  C18 silica sphere were provided by Borui Jianhe Chromatographic Technology Co. (Tianjin, China). Analytical grade solvent of tetrahydrofuran (THF), N,N-dimethylformamide (DMF), Acetone and acetic acid were obtained from Sinopharm Chemical Reagent Co.,Ltd (Shanghai, China). Ultrapure water was obtained from Wahaha Foods Co. Ltd. (Shanghai, China).

**Instrumentation.** PXRD patterns were recorded on a D2 PHASER diffractometer (Bruker, German) using Cu  $K\alpha$  radiation ( $\lambda = 1.5418 \text{ \AA}$ ) with a scanning speed of  $8^\circ \text{ min}^{-1}$  and a step size of  $0.02^\circ$  in  $2\theta$ . Solid-state NMR experiments were performed on Infinityplus 300 (VARIAN, USA). SEM images were recorded on an S-3500N (Hitachi, Japan) scanning electron microscope. FTIR spectra were measured on a Nicolet IR IS10 spectrometer (Nicolet, USA) with pure KBr pellets.  $\text{N}_2$  adsorption experiments were performed on Autosorb-iQ (Quantachrome, USA) using  $\text{N}_2$  adsorption at 77 K. The pore size distribution of prepared COFs was calculated using the density functional theory model. An e 2695 alliance HPLC with 2998 PDA detector (Waters, USA) was used for HPLC experiments. The packed column was prepared with HY-HPLC-LC-M (Hydrosys, China).

### **Preparation of COF-300 via amorphous-to-crystalline transformation**

The COF-300 was prepared according to the previous works with little modifications.<sup>1,2</sup> TPDA (24 mg, 0.178 mmol) and TAM (40 mg, 0.104 mmol) were separately dissolved in 10 mL ethanol with 10 min sonication, mixed in a 100 mL flask, and refluxed for 4 hours to obtain the amorphous polymer. After rinsing with ethanol, the polymer was collected via centrifugation and evacuated in vacuum at room temperature overnight. Subsequently, the polymer was dispersed with 1.5 mL dioxane, 1.5 mL mesitylene and 0.3 mL 6 M aqueous acetic acid in a 35 mL Schlenk tube (OD 26 × L 125 mm). After degassed through three freeze–pump–thaw cycles, the tuber was heated at 120 °C for 3 d. The formed yellow product was collected via centrifugation and rinsed with DMF and THF. The isolated powder was then extracted with acetone and dried at 100 °C under vacuum for 24 h to obtain COF-300.

### **Preparation of COF-300@SiO<sub>2</sub> via LBL**

To facilitate consistent COF-300@SiO<sub>2</sub> preparation, the repeated reaction cycles was performed. 0.1 g SiO<sub>2</sub>-NH<sub>2</sub>, 20 mL ethanol solution of TPDA (1.5 mmol L<sup>-1</sup>) and 2 mL 6 M aqueous acetic acid were mixed in a 100 mL flask, and refluxed for 4 hours to obtain the SiO<sub>2</sub>-PDA. After rinsed to remove the unreacted monomer, the SiO<sub>2</sub>-PDA was refluxed with 20 mL TAM (0.75 mmol L<sup>-1</sup>) and 2 mL 6 M aqueous acetic acid to obtain SiO<sub>2</sub>-TAM for one cycle. The ploymer@SiO<sub>2</sub> formed for N cycles. After rinsing with ethanol, the polymer@SiO<sub>2</sub> was collected via centrifugation and evacuated in vacuum at room temperature overnight. Subsequently, the polymer@SiO<sub>2</sub> was dispersed with 1 mL dioxane, 1 mL mesitylene and 0.2 mL 6 M

aqueous acetic acid in a 35 mL Schlenk tube (OD 26 × L 125 mm). After degassed through three freeze–pump–thaw cycles, the tuber was heated at 120 °C for 3 d. The formed product was collected via centrifugation and rinsed with THF. The isolated powder was then extracted with acetone and dried at 100 °C under vacuum for 24 h to obtain COF-300@SiO<sub>2</sub>.

### **Preparation of packed column for HPLC**

3.0 g of COF-300@SiO<sub>2</sub> was dispersed in a vessel with 40 mL ethanol under ultrasonication for 5 min. The suspension was then downward packed into a stainless steel column (15 cm length; 4.6 mm i.d.) under 6000 psi. The C<sub>18</sub>, control SiO<sub>2</sub>-NH<sub>2</sub> and SiO<sub>2</sub>-NH<sub>2</sub> columns were prepared in the same way as the COF-300@SiO<sub>2</sub> columns. The all the prepared packed column was conditioned with ethanol at a flow of 1 mL min for 2 h before chromatographic experiments.

### **Calculation of thermodynamic parameters**

The enthalpy change ( $\Delta H$ ) and entropy change ( $\Delta S$ ) for the transfer of the analyte between the mobile phase and the prepared COF-300@SiO<sub>2</sub> stationary phase were calculated according to the van't Hoff equation.<sup>3</sup>

$$\ln k' = -\Delta H/(RT) + \Delta S/R + \ln \Phi \quad (1)$$

$k'$  is retention factor,  $R$  is gas constant,  $T$  is absolute temperature, and  $\Phi$  is the phase ratio, which is defined as the volume ratio of the stationary phase ( $V_s$ ) to the mobile phase ( $V_m$ ).

$$k' = (t - t_0)/t_0 \quad (2)$$

where  $t$  is the retention time,  $t_0$  the column void time which was determined by

injecting a small plug of acetone and recording the perturbation signal.

$$V_s = V_{\text{Col}} - V_0 \quad (3)$$

$$V_0 = t_0 \times F \quad (4)$$

where  $V_{\text{Col}}$  is the geometrical volume of the column, and  $F$  the flow rate of the mobile phase.

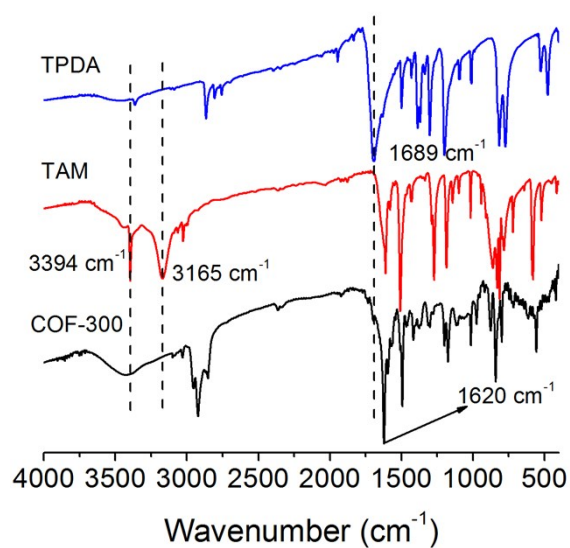

**Fig. S1** FTIR spectra of COF-300, TAM and TPDA.

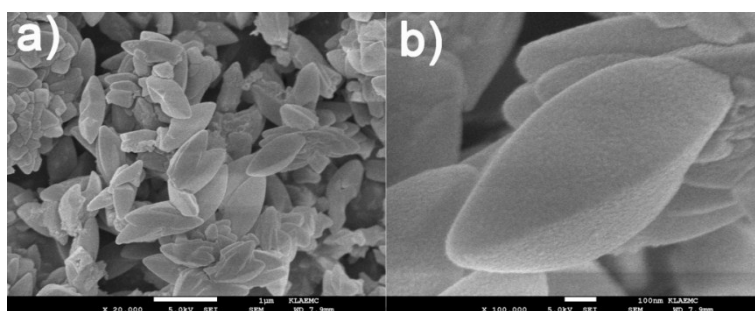

**Fig. S2** SEM images of the COF-300 prepared via amorphous-to-crystalline transformation.

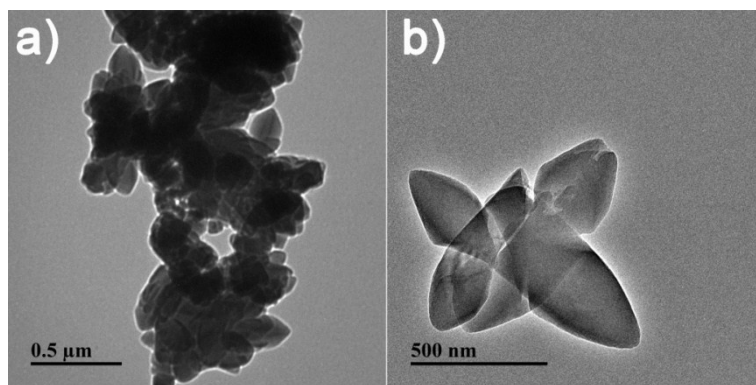

**Fig. S3** TEM images of the COF-300 prepared via amorphous-to-crystalline transformation.

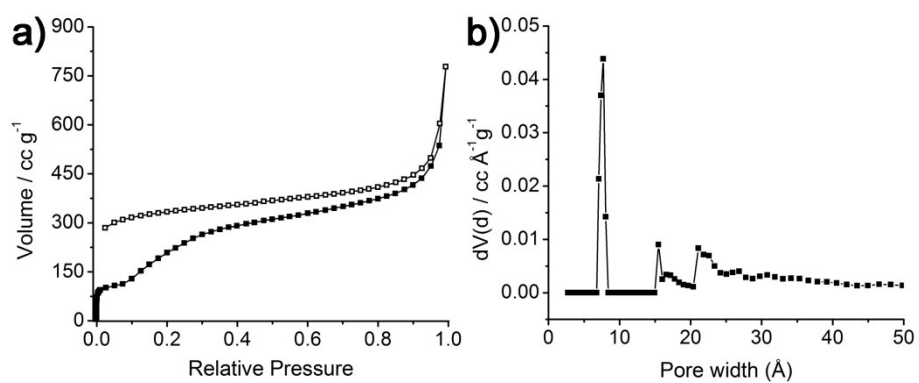

**Fig. S4** (a) N<sub>2</sub> adsorption-desorption isotherms and (b) pore size distribution curves of the COF-300 prepared via amorphous-to-crystalline transformation.

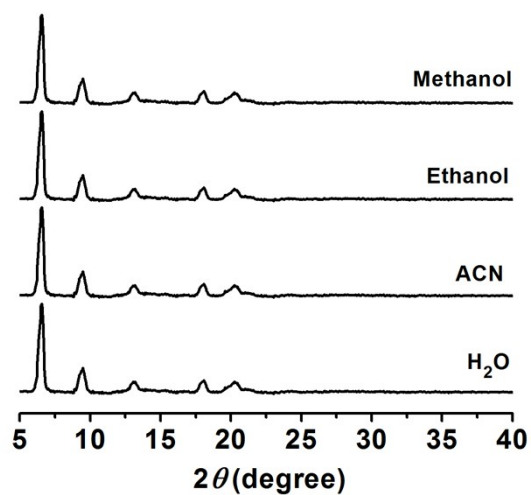

**Fig. S5** The stability of COF-300 in various solvents.

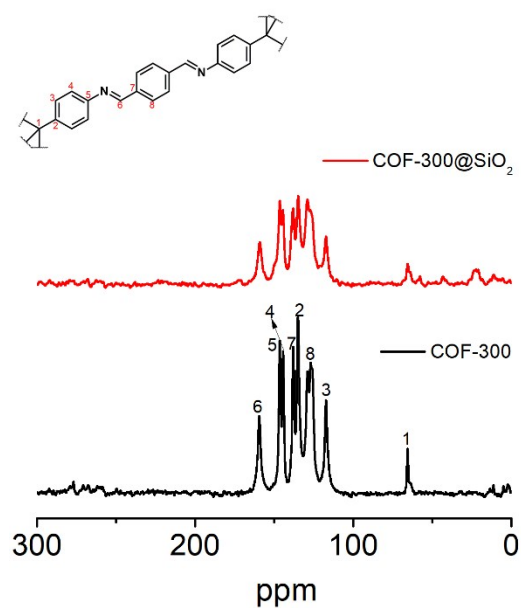

**Fig. S6** Solid-state <sup>13</sup>C CP-MAS spectra of COF-300 and COF-300@SiO<sub>2</sub>.

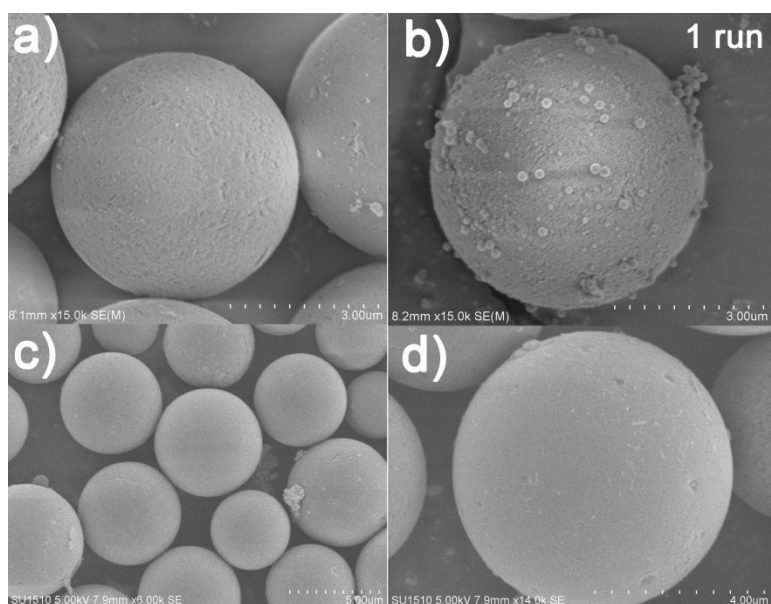

**Fig. S7** SEM images: (a) SiO<sub>2</sub>-NH<sub>2</sub>; (b) COF-300@SiO<sub>2</sub> after 1 run reaction; (c, d) SiO<sub>2</sub>-NH<sub>2</sub> treated under the same reaction conditions but no precursors for COF-300.

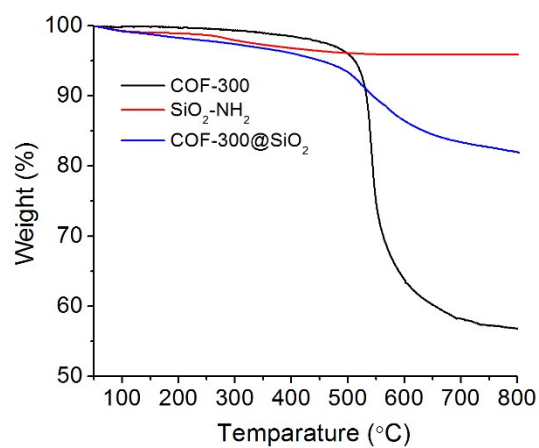

**Fig. S8** TGA curves of COF-300, SiO<sub>2</sub>-NH<sub>2</sub> and COF-300@SiO<sub>2</sub>.

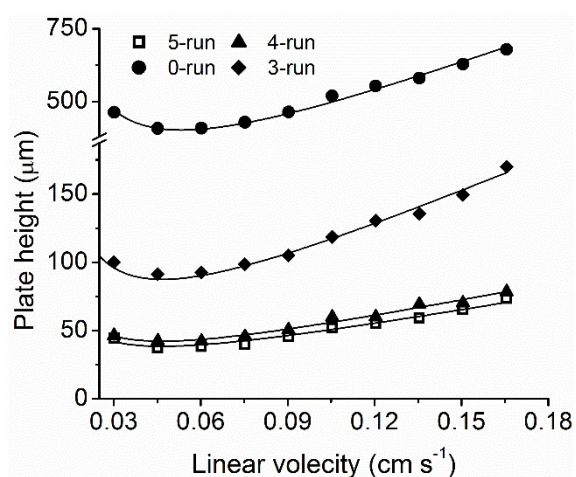

**Fig. S9** Van Deemter plots of the H (plate height) as a function of u (velocity) for COF-300@SiO<sub>2</sub> with different runs. Conditions: column, 150 mm × 4.6 mm i.d.. Mobile phase: ACN/H<sub>2</sub>O (45/55, v/v), 1.0 mL min<sup>-1</sup>; UV detection at 210 nm. Analyte: toluene.



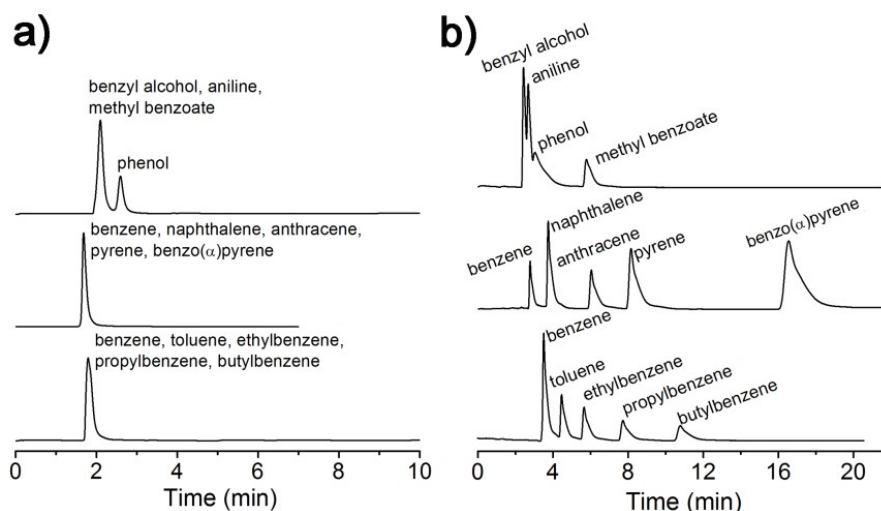

**Fig. S10** HPLC chromatograms: (a) SiO<sub>2</sub>-NH<sub>2</sub> column; (b) C<sub>18</sub> column. Experimental conditions: column, 15 cm × 4.6 mm i.d.; mobile phase, ACN/H<sub>2</sub>O (20/80, v/v) and 1.0 mL min<sup>-1</sup> for benzene homologue and substituted aromatics in (a), ACN/H<sub>2</sub>O (50/50, v/v) and 1.0 mL min<sup>-1</sup> for PAHs in (a), ACN/H<sub>2</sub>O (70/30, v/v) and 1.0 mL min<sup>-1</sup> for benzene homologue in (b), ACN/H<sub>2</sub>O (80/20, v/v) and 1.0 mL min<sup>-1</sup> for PAHs in (b), ACN/H<sub>2</sub>O (30/70, v/v) and 1.0 mL min<sup>-1</sup> for substituted aromatics in (b); UV detection at 210 nm.

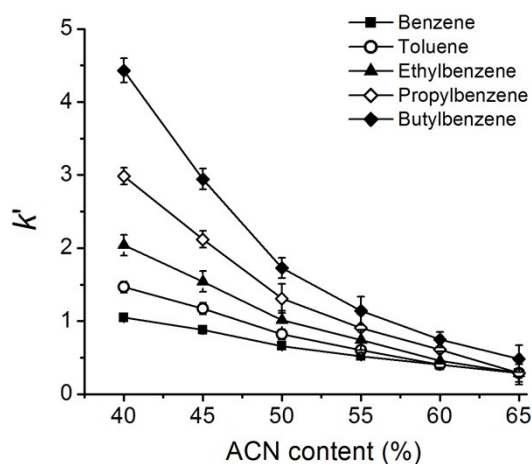

**Fig. S11** Effect of ACN content in mobile phases on the retention factors of benzene homologue on COF-300@SiO<sub>2</sub> packed column (15 cm × 4.6 mm i.d.) with ACN/H<sub>2</sub>O as the mobile phase at a 1.0 mL min<sup>-1</sup> and UV detection at 210 nm.

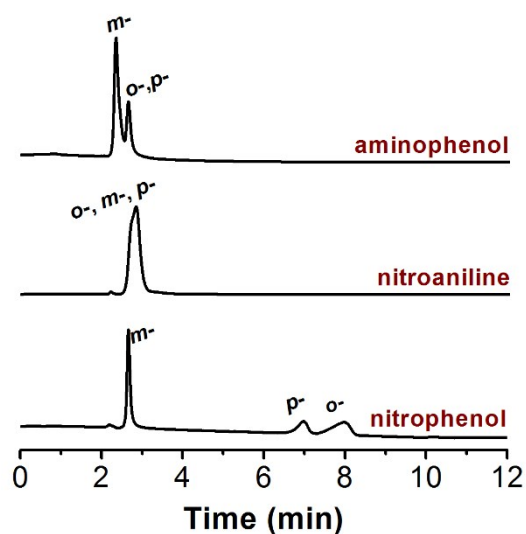

**Fig. S12** HPLC chromatograms of isomers on the modified  $\text{SiO}_2\text{-NH}_2$  packed column ( $15\text{ cm} \times 4.6\text{ mm i.d.}$ ) prepared in 1 mL dioxane, 1 mL mesitylene and 0.2 mL 6 M aqueous acetic acid without precursors of COF-300 at  $120\text{ }^\circ\text{C}$  for 3 d. Experimental conditions: ACN/ $\text{H}_2\text{O}$  (25/75, v/v),  $1.5\text{ mL min}^{-1}$  and UV detection 230 nm for nitrophenol, ACN/ $\text{H}_2\text{O}$  (20/80, v/v),  $1.5\text{ mL min}^{-1}$  and UV detection 254 nm for nitroaniline, ACN/ $\text{H}_2\text{O}$  (30/70, v/v),  $1.0\text{ mL min}^{-1}$  and UV detection 210 nm for aminophenol.

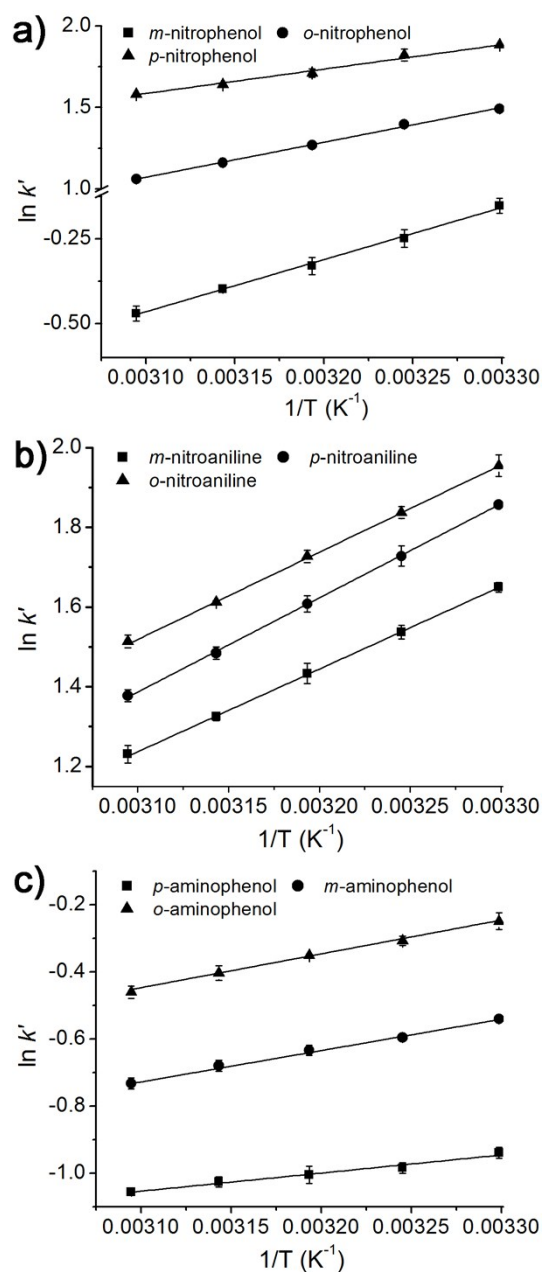

**Fig. S13** Van't Hoff plots on the COF-300@SiO<sub>2</sub> packed column: (a) *o*-, *m*-, *p*-nitrophenol; (b) *o*-, *m*-, *p*-nitroaniline; (c) *o*-, *m*-, *p*-aminophenol. Experimental conditions are as shown in Fig. 4.

**Table S1** Van Deemter coefficients obtained from the fitting curve of Fig. S10

| Column | Van Deemter coefficients |                                     |        |
|--------|--------------------------|-------------------------------------|--------|
|        | A ( $\mu\text{m}$ )      | B ( $\mu\text{m}^2 \text{s}^{-1}$ ) | C (ms) |
| 0-run  | 1.29                     | 107151                              | 375.5  |
| 3-run  | 2.09                     | 19903                               | 91.5   |
| 4-run  | 2.57                     | 9232                                | 42.5   |
| 5-run  | 3.23                     | 9465                                | 40.1   |

**Table S2** Structure and Log  $K_{ow}$  of analytes

| Analytes                | Structure                                                                           | Log $K_{ow}$ <sup>a</sup> | Analytes               | Structure                                                                             | Log $K_{ow}$ <sup>a</sup> |
|-------------------------|-------------------------------------------------------------------------------------|---------------------------|------------------------|---------------------------------------------------------------------------------------|---------------------------|
| Benzene                 |    | 2.13                      | phenol                 |    | 1.46                      |
| Toluene                 |    | 2.73                      | methyl benzoate        |    | 2.12                      |
| ethylbenzene            |    | 3.15                      | <i>o</i> -nitrophenol  |    | 1.79                      |
| propylbenzene           |    | 3.69                      | <i>m</i> -nitrophenol  |    | 2.00                      |
| butylbenzene            |    | 4.38                      | <i>p</i> -nitrophenol  |    | 1.91                      |
| naphthalene             |  | 3.30                      | <i>o</i> -nitroaniline |  | 1.85                      |
| anthracene              |  | 4.45                      | <i>m</i> -nitroaniline |  | 1.37                      |
| Pyrene                  |  | 4.88                      | <i>p</i> -nitroaniline |  | 1.39                      |
| benzo( $\alpha$ )pyrene |  | 6.13                      | <i>o</i> -aminophenol  |  | 0.62                      |
| Aniline                 |  | 0.90                      | <i>m</i> -aminophenol  |  | 0.62                      |
| benzyl alcohol          |  | 1.01                      | <i>p</i> -aminophenol  |  | 0.62                      |

<sup>a</sup> The octanol-water partitioning coefficients were from EPI Suite (V. 4.11).

**Table S3** Retention factors  $k'$  for alkylbenzenes on COF-300@SiO<sub>2</sub> packed columns and C-18 column with ACN/H<sub>2</sub>O (60/40, v/v) as the mobile phase at a 1.0 mL min<sup>-1</sup> and UV detection at 210 nm

| $k'$          | COF-300@SiO <sub>2</sub> | C-18 |
|---------------|--------------------------|------|
| Benzene       | 0.40                     | 1.00 |
| Toluene       | 0.40                     | 1.55 |
| Ethylbenzene  | 0.41                     | 2.24 |
| Propylbenzene | 0.62                     | 3.42 |
| Butylbenzene  | 0.75                     | 5.17 |

**Table S4** Precision for isomers on the COF-300@SiO<sub>2</sub> packed column

| Analytes               | RSD (%) (n=10) |             |           |
|------------------------|----------------|-------------|-----------|
|                        | T              | Peak height | Peak area |
| <i>m</i> -nitrophenol  | 0.14           | 0.94        | 1.03      |
| <i>o</i> -nitrophenol  | 0.10           | 0.80        | 1.05      |
| <i>p</i> -nitrophenol  | 0.12           | 0.93        | 0.98      |
| <i>m</i> -nitroaniline | 0.17           | 1.18        | 0.93      |
| <i>p</i> -nitroaniline | 0.17           | 1.16        | 0.97      |
| <i>o</i> -nitroaniline | 0.16           | 1.09        | 0.92      |
| <i>p</i> -aminophenol  | 0.13           | 0.68        | 0.83      |
| <i>m</i> -aminophenol  | 0.12           | 0.82        | 0.94      |
| <i>o</i> -aminophenol  | 0.12           | 0.73        | 0.85      |

**Table S5** The column efficiency of COF-300@SiO<sub>2</sub> for the isomers under the separation conditions as shown in Fig. 4b-4d

| Analytes               | N (plates/m) |
|------------------------|--------------|
| <i>m</i> -nitrophenol  | 28767        |
| <i>o</i> -nitrophenol  | 34327        |
| <i>p</i> -nitrophenol  | 39593        |
| <i>m</i> -nitroaniline | 33200        |
| <i>p</i> -nitroaniline | 35987        |
| <i>o</i> -nitroaniline | 36800        |
| <i>p</i> -aminophenol  | 14407        |
| <i>m</i> -aminophenol  | 17133        |
| <i>o</i> -aminophenol  | 15280        |



**Table S6** Selectivity of isomers on COF-300@SiO<sub>2</sub> packed column in the temperature range of 30–50 °C

| T (°C) | Selectivity ( $\alpha$ ) |              |              |              |              |              |
|--------|--------------------------|--------------|--------------|--------------|--------------|--------------|
|        | Nitrophenol              |              | nitroaniline |              | aminophenol  |              |
|        | <i>o-/m-</i>             | <i>p-/o-</i> | <i>p-/m-</i> | <i>o-/p-</i> | <i>m-/p-</i> | <i>o-/m-</i> |
| 30     | 5.18                     | 1.48         | 1.23         | 1.12         | 1.49         | 1.34         |
| 35     | 5.19                     | 1.53         | 1.21         | 1.13         | 1.48         | 1.33         |
| 40     | 4.95                     | 1.56         | 1.20         | 1.14         | 1.45         | 1.33         |
| 45     | 4.76                     | 1.61         | 1.18         | 1.15         | 1.41         | 1.32         |
| 50     | 4.62                     | 1.68         | 1.17         | 1.17         | 1.38         | 1.31         |

**Table S7** p*K*<sub>a</sub> of the isomers

| Analytes               | p <i>K</i> <sub>a</sub> <sup>a</sup> (25 °C) |
|------------------------|----------------------------------------------|
| <i>m</i> -nitrophenol  | 8.36                                         |
| <i>o</i> -nitrophenol  | 7.23                                         |
| <i>p</i> -nitrophenol  | 7.15                                         |
| <i>m</i> -nitroaniline | 2.46                                         |
| <i>p</i> -nitroaniline | 1.02                                         |
| <i>o</i> -nitroaniline | -0.25                                        |
| <i>p</i> -aminophenol  | 5.48                                         |
| <i>m</i> -aminophenol  | 4.37                                         |
| <i>o</i> -aminophenol  | 4.78                                         |

<sup>a</sup> CRC Handbook of Chemistry and Physics 99th Edition

**Table S8** Thermodynamic parameters and  $R^2$  (correlation coefficient) for isomer analytes calculated from the van't Hoff plots in Fig S13

| Analytes               | $\Delta H$<br>(KJ mol <sup>-1</sup> ) | $\Delta S$<br>(J mol <sup>-1</sup> K <sup>-1</sup> ) | $\Delta G^a$<br>(KJ mol <sup>-1</sup> ) | $R^2$  |
|------------------------|---------------------------------------|------------------------------------------------------|-----------------------------------------|--------|
| <i>o</i> -nitrophenol  | -17.87 ± 0.17                         | -36.34 ± 0.49                                        | -7.04 ± 0.22                            | 0.9972 |
| <i>m</i> -nitrophenol  | -12.77 ± 0.19                         | -33.32 ± 0.55                                        | -2.84 ± 0.25                            | 0.9986 |
| <i>p</i> -nitrophenol  | -12.87 ± 0.14                         | -16.60 ± 0.36                                        | -7.92 ± 0.18                            | 0.9970 |
| <i>o</i> -nitroaniline | -18.03 ± 0.16                         | -33.03 ± 0.50                                        | -8.18 ± 0.22                            | 0.9997 |
| <i>m</i> -nitroaniline | -17.12 ± 0.14                         | -32.61 ± 0.45                                        | -7.40 ± 0.19                            | 0.9997 |
| <i>p</i> -nitroaniline | -19.60 ± 0.17                         | -39.09 ± 0.55                                        | -7.95 ± 0.24                            | 0.9987 |
| <i>o</i> -aminophenol  | -8.45 ± 0.22                          | -19.82 ± 0.56                                        | -2.54 ± 0.28                            | 0.9959 |
| <i>m</i> -aminophenol  | -7.61 ± 0.25                          | -19.47 ± 0.39                                        | -1.81 ± 0.27                            | 0.9986 |
| <i>p</i> -aminophenol  | -4.48 ± 0.17                          | -12.49 ± 0.36                                        | -0.76 ± 0.20                            | 0.9991 |

<sup>a</sup> Calculated with T = 298.15

## Reference

1. F. J. Uribe-Romo, J. R. Hunt, H. Furukawa, C. Klöck, M. O’Keeffe and O. M. Yaghi, *J. Am. Chem. Soc.*, 2009, **131**, 4570-4571.
2. J. Tan, S. Namuangruk, W. Kong, N. Kungwan, J. Guo and C. Wang, *Angew. Chem. Int. Ed.*, 2016, **55**, 13979-13984.
3. Y.-Y. Fu, C.-X. Yang and X.-P. Yan, *Chem. Eur. J.*, 2013, **19**, 13484-13491.
